# Supplementary material for: Self-generating electricity system driven by aqueous humor flow and trabecular meshwork contraction motion activated BCKa for glaucoma intraocular pressure treatment
Source: Royal Society of Chemistry journal article supplement (doi:10.1039/d4mh01004c), 2024-10-21
Supplement: d4mh01004c1.pdf [file d4mh01004c1.pdf]

# Supplementary Materials for

## Self-generating electricity system driven by aqueous humor flow and trabecular meshwork contraction motion activated BCKa for glaucoma intraocular pressure treatment

Ruiqi Wang *et al.*

\*Corresponding author. Email: tianweiming@hit.edu.cn

### Supplementary Text

**SI Table1:** Primer sequences of human RT-PCR

| Target        | Forward              | Reverse               |
|---------------|----------------------|-----------------------|
| <i>GAPDH</i>  | CTGGGCTACACTGAGCACC  | AAGTGGTCGTTGAGGGCAATG |
| <i>FN</i>     | CGGTGGCTGTCAGTCAAAG  | AAACCTCGGCTTCCTCCATAA |
| <i>COL1a1</i> | GTGCGATGACGTGATCTGTG | CGGTGGTTTCTTGGTCCGGT  |
| <i>α-SMA</i>  | CTATGAGGGCTATGCCTTGC | GCTCAGCAGTAGTAACGAAGG |
|               | C                    | A                     |

**SI Table2:** Primer sequences of rabbit RT-PCR

| Target       | Forward                | Reverse                 |
|--------------|------------------------|-------------------------|
| <i>GAPDH</i> | GTTTGTGATGGGCGTGAACC   | GTCATGAGCCCCTCCACAAT    |
| <i>IL-6</i>  | ACTCACCTCTTCAGAACGAATT | CCATCTTTGGAAGGTTTCAGGTT |
|              | G                      | G                       |
| <i>α-SMA</i> | AGCACTGTCAGGAATCCCGT   | CAGCTCTTGGAGCATCGTCT    |

**SI Table3:** The electrical conductivity of hydrogel

| Sample                        | Conductivity, $\mu\text{S}/\text{cm}$ |
|-------------------------------|---------------------------------------|
| AM/GelMA/HA 0% MXene hydrogel | $4.01 \pm 0.08$                       |
| AM/GelMA/HA 4% MXene hydrogel | $7.92 \pm 0.16$                       |

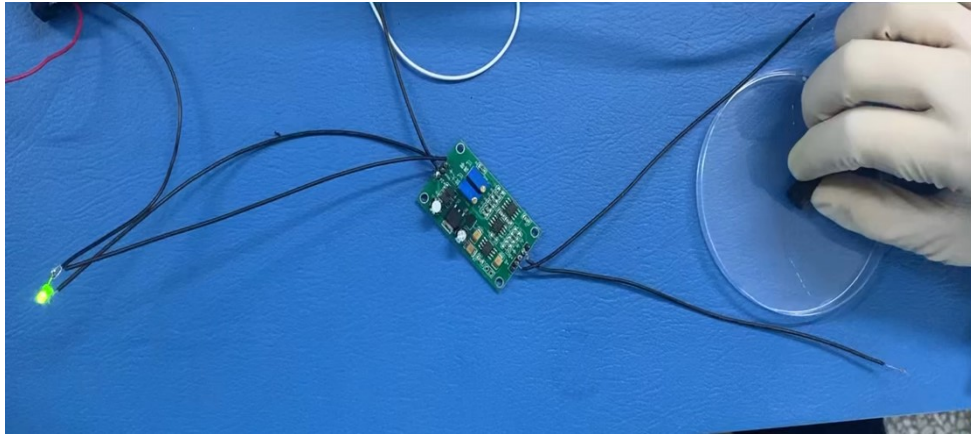

**Supplementary Video 1.** The movie of LED lighted by hand tapping of the AM/GelMA/HA 4% MXene hydrogel.

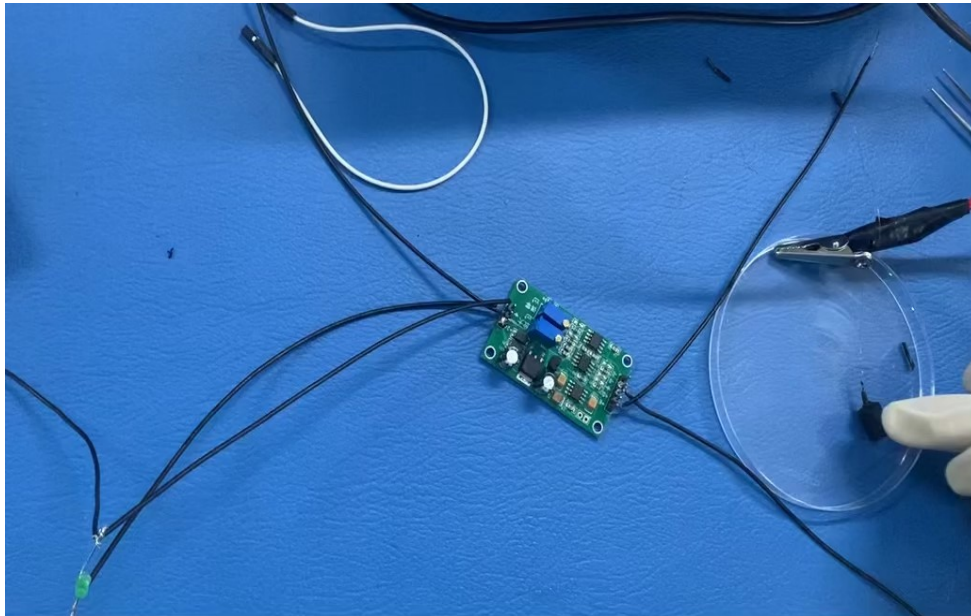

**Supplementary Video 2.** The movie of LED lighted by hand tapping of the AM/GelMA/HA 8% MXene hydrogel.

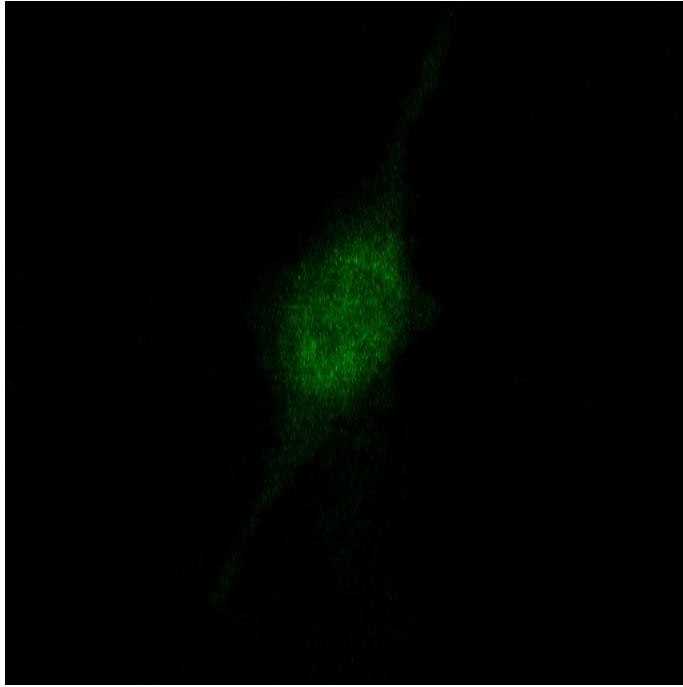

**Supplementary Video 3.** Fluorescence time lapses of  $\text{Ca}^{2+}$  imaging in piezoelectrically stimulated HTM cells. Total duration of the time lapse = 10 second.

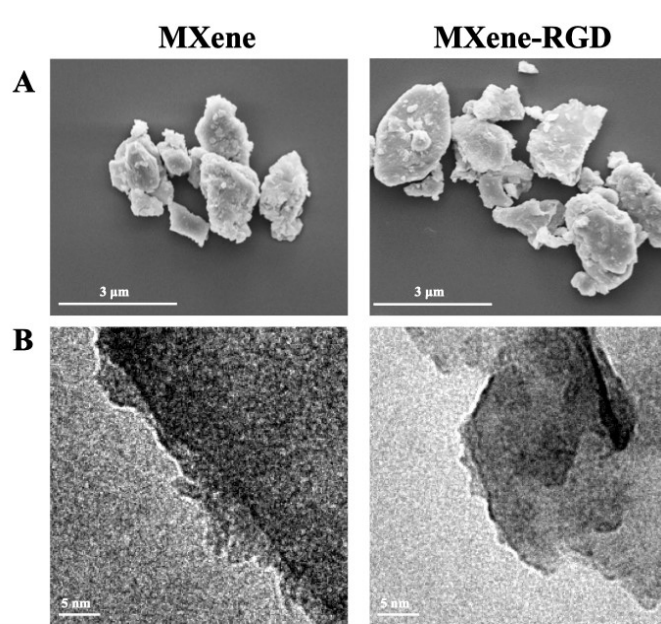

**Supplementary Figure 1.** SEM (A) and TEM (B) images of MXene and MXene-RGD

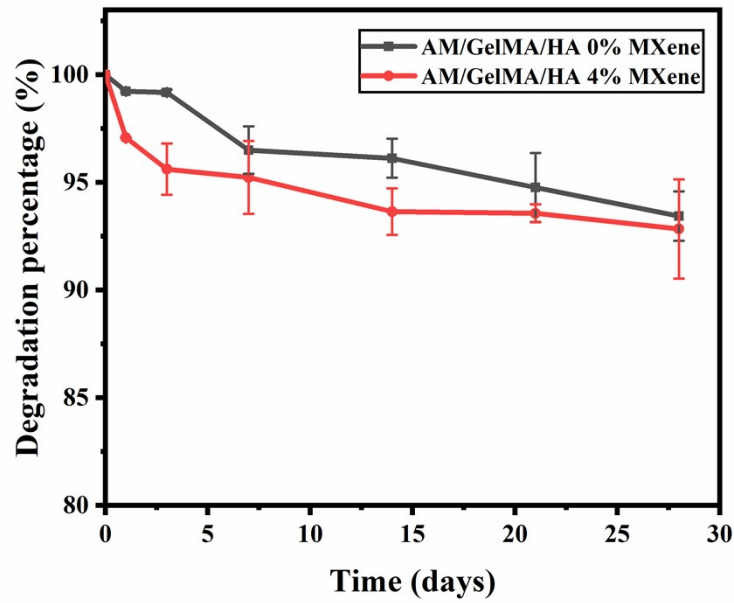

**Supplementary Figure 2.** Degradation performance of the hydrogel for different doping concentrations of MXene nanosheets.

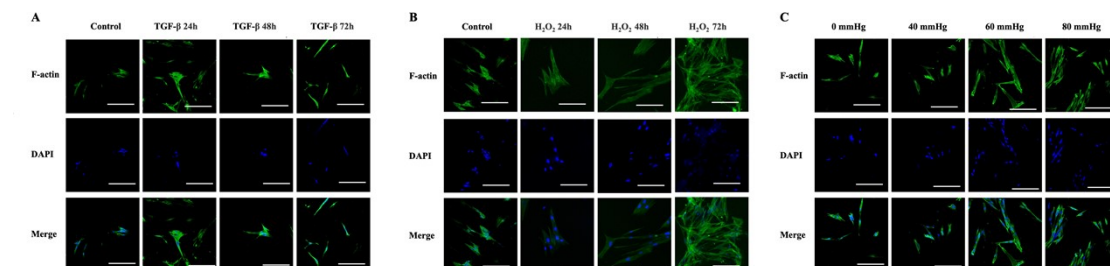

**Supplementary Figure 3.** Representative confocal images of F-actin in HTM cells with TGF-β<sub>2</sub>, H<sub>2</sub>O<sub>2</sub>, and elevated pressure treatment. Scale bar=50 μm.
